# Supplementary material
Source: PubMed Central journal article supplement (PMC6135086)
Supplement: NIHMS1504923-supplement-1.pdf [file NIHMS1504923-supplement-1.pdf]

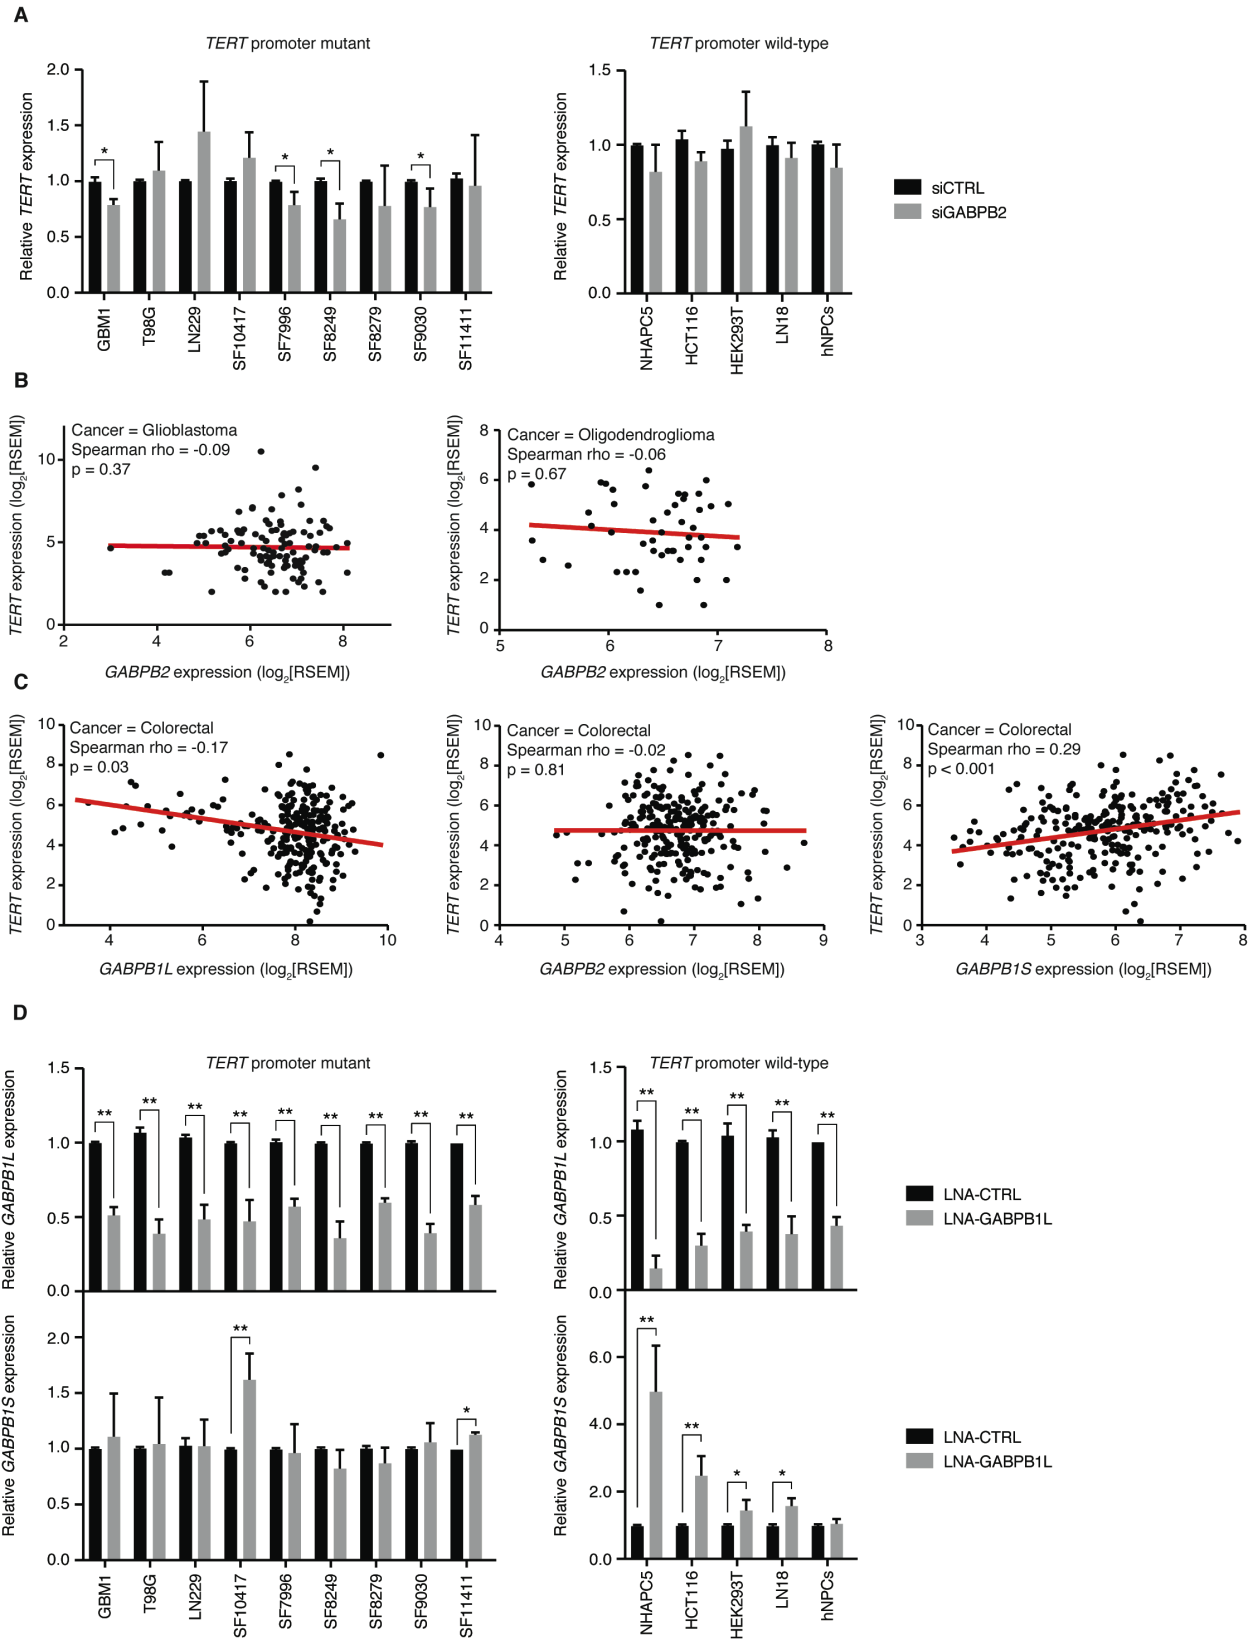

**Figure S1, related to Figure 1.**  $\beta$ 1S and  $\beta$ 2 do not robustly positively regulate *TERT* in *TERT* promoter mutant cancer with intact  $\beta$ 1L. **(A)** *TERT* expression following siRNA-mediated knockdown of  $\beta$ 2 (siGABPB2) in *TERT* promoter mutant (left) or wild-type (right) cell lines and primary cultures. \*p value<0.05, two-sided Student's t-test compared to a non-targeting siRNA (siCTRL) in each respective line. **(B,C)** Correlation of *GABPB1L*, *GABPB1S*, or *GABPB2* mRNA expression ( $\log_2$ [RSEM normalized counts]) versus *TERT* mRNA expression ( $\log_2$ [RSEM normalized counts]) from 109 *TERT*-expressing GBMs and 49 *TERT* promoter-mutant oligodendrogliomas **(B)** and 262 *TERT*-expressing colorectal cancers **(C)**. Red line indicates trend line. Spearman's Rank-Order Correlation was used to generate Spearman's rho and p values for each monotonic correlation. **(D)** *GABPB1L* and *GABPB1S* expression following LNA-ASO knockdown of  $\beta$ 1L (LNA-GABPB1L) in *TERT* promoter mutant (left) or wild-type (right) cell lines and primary cultures compared to an LNA-ASO control (LNA-CTRL). \*p value<0.05, \*\*p value<0.01, two-sided Student's t-test compared to LNA-CTRL in each respective line. All values are mean  $\pm$  S.D. of at least three independent experiments (two independent experiments for SF10417 line).

**A**

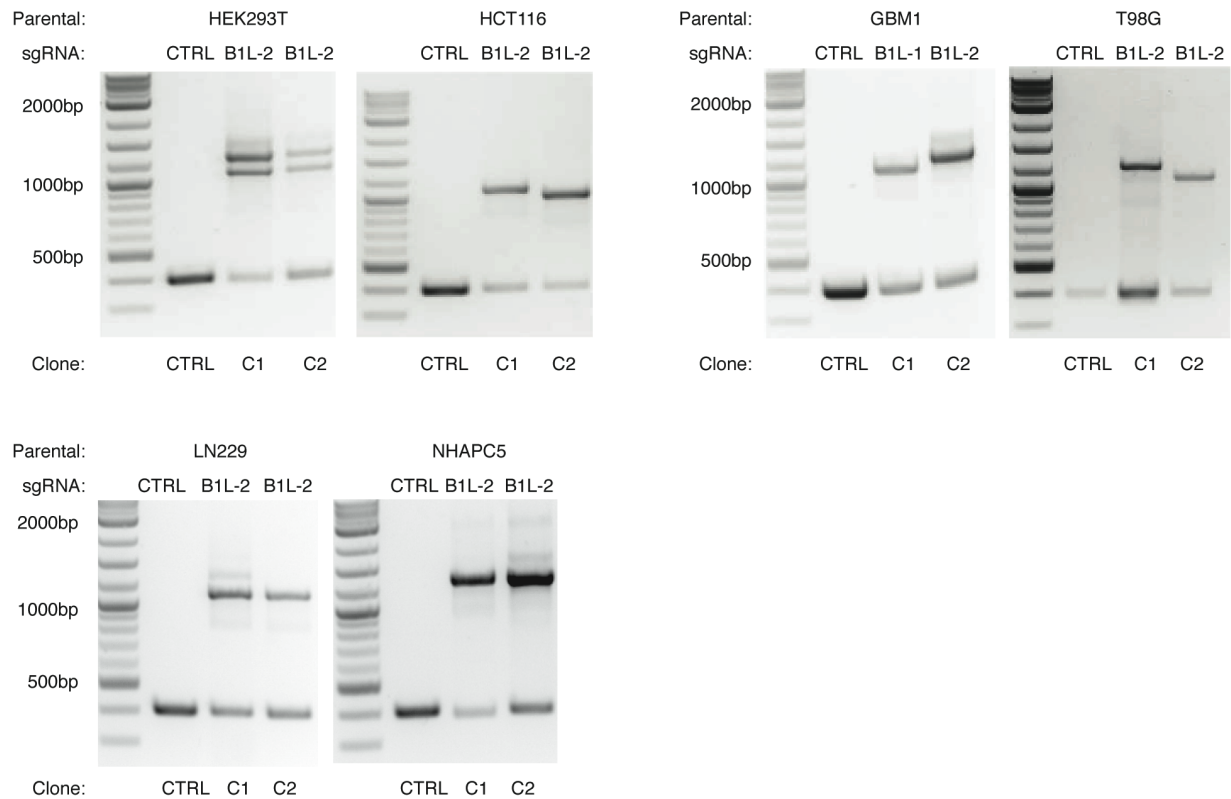

**B**

**sgRNA B1L-1** **sgRNA B1L-2**

GABPB1L wt: GACAGCAGCTCCTAAAGAAAGAACAGGAAGCAGAGGCCTACAGACAGAAGTTGGAAGCTATGA

GBM1 C1: GACAGCAGCTCCTAAAGAAAGAACAGGAAGCAGAGGCCTACAGACAGAAGTTGGAAGCTATGA (DEL1)

GBM1 C2: GACAGCAGCTCCTAAAGAAAGAACAGGAAGCAGAGGCCTACAGACAGAAGTTGGAAGCTATGA

HCT116 C1: GACAGCAGCTCCTAAAGAAAGAACAGGAAGCAGAGGCCTACAGACAGAAGTTGGAAGCTATGA

HCT116 C2: GACAGCAGCTCCTAAAGAAAGAACAGGAAGCAGAGGCCTACAGACAGAAGTTGGAAGCTATGA

T98G C1: GACAGCAGCTCCTAAAGAAAGAACAGGAAGCAGAGGCCTACAGAC---AGTTGGGGCTATGA (DEL2)

T98G C1: GACAGCAGCTCCTAAAGAAAGAACAGGAAGCAGAGGCCTACAGAC---AGTTGGAAGCTATGA (DEL3)

T98G C1: GACAGCAGCTCCTAAAGAAAGAACAGGAAGCAGAGGCCTACAGAC---AGTTGGAAGCTATGA

T98G C1: GACAGCAGCTCCTAAAGAAAGAACAGGAAGCAGAGGCCTACAGAC---AGTTGGAAGCTATGA

T98G C2: GACAGCAGCTCCTAAAGAAAGAACAGGAAGCAGAGGCCTACAGAC---AGTTGGAAGCTATGA

T98G C2: GACAGCAGCTCCTAAAGAAAGAACAGGAAGCAGAGGCCTACAGAC---AGTTGGAAGCTATGA

T98G C2: GACAGCAGCTCCTAAAGAAAGAACAGGAAGCAGAGGCCTACAGAC---AGTTGGAAGCTATGA

T98G C2: GACAGCAGCTCCTAAAGAAAGAACAGGAAGCAGAGGCCTACAGAC---AGTTGGAAGCTATGA

HEK293T C1: GACAGCAGCTCCTAAAGAAAGAACAGGAAGCAGAGGCCTACAGACAGAAGTTGGAAGCTATGA

HEK293T C2: GACAGCAGCTCCTAAAGAAAGAACAGGAAGCAGAGGCCTACAGAC---AGTTGGAAGCTATGA

HEK293T C2: GACAGCAGCTCCTAAAGAAAGAACAGGAAGCAGAGGCCTACAGAC---AGTTGGAAGCTATGA

LN229 C1: GACAGCAGCTCCTAAAGAAAGAACAGGAAGCAGAGGCCTACAGACAGAAGTTGGAAGCTATGA

LN229 C2: GACAGCAGCTCCTAAAGAAAGAACAGGAAGCAGAGGCCTACAGACAGA---GTTGGAAGCTATGA

LN229 C2: GACAGCAGCTCCTAAAGAAAGAACAGGAAGCAGAGGCCTACAGACAGA---GTTGGAAGCTATGA

NHAPC5 C1: GACAGCAGCTCCTAAAGAAAGAACAGGAAGCAGAGG-----TTTGAAGCTATGA

NHAPC5 C1: GACAGCAGCTCCTAAAGAAAGAACAGGAAGCAGAGGCCTACAGAC-----AGTT

NHAPC5 C2: GACAGCAGCTCCTAAAGAAAGAACAGGAAGCAGAGGCCTACAGAC---AGTTGGAAGCTATGA

**Figure S2, related to Figure 2.** Validation of CRISPR-Cas9 editing. **(A)** UV images of successful integration of the targeting vector (~1.1kb for forward integration, ~1.3kb for reverse integration) into exon 9 of *GABPB1* for the lines used in this study. **(B)** Sanger sequencing of *GABPB1* exon 9 showing indels in alleles without targeting vector integration for each  $\beta$ 1L-reduced clone. DEL1, DEL2, and DEL3 denote deletions induced in Figure 2B.

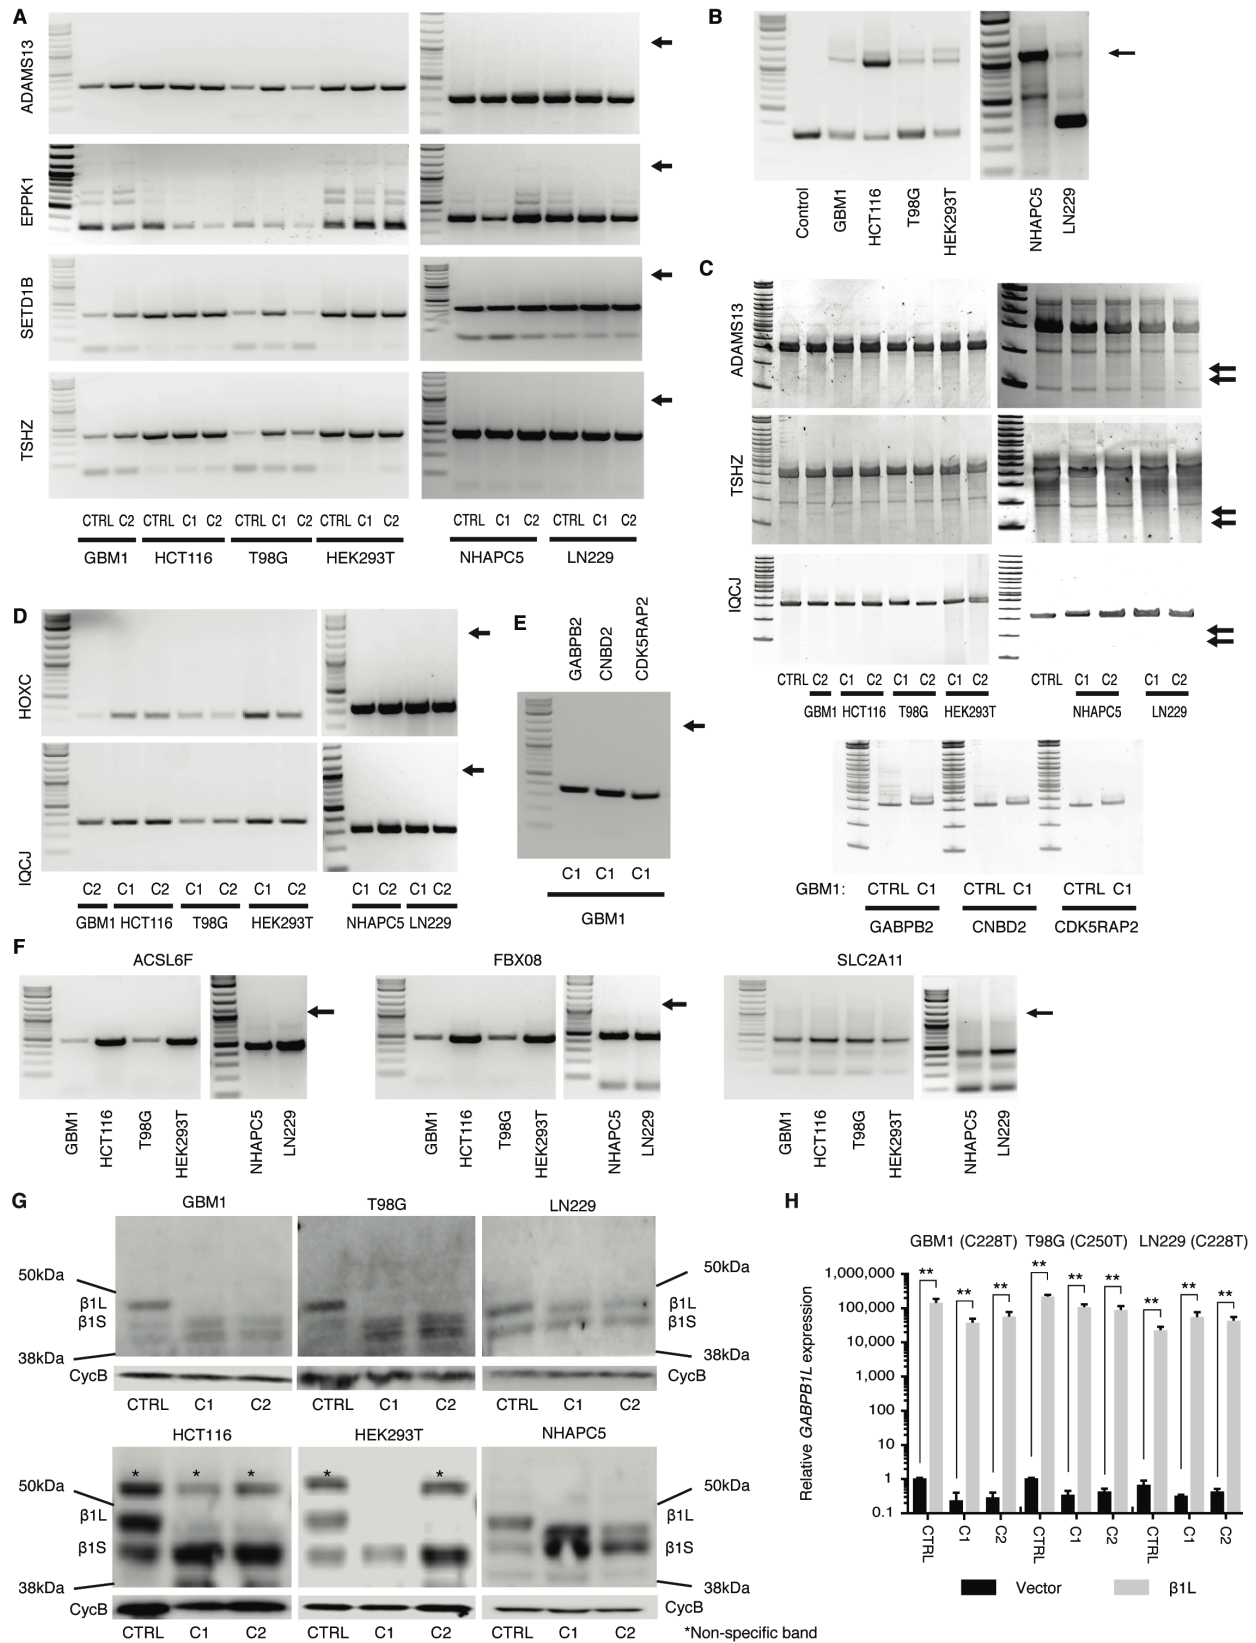

**Figure S3, related to Figure 2.** Validation of  $\beta$ 1L protein reduction and analysis of potential off-target mutations introduced by CRISPR-Cas9 editing. **(A)** PCR analysis for potential non-specific integration of the targeting vector at off-target coding regions for the universal sgRNA. **(B)** On-target integration of the targeting vector at the negative control locus. **(C)** Surveyor analysis to detect potential mutations introduced by CRISPR-Cas9 at coding sequences for all sgRNAs. Arrows indicate expected size of fragments from Surveyor assay if mutations are present. **(D-F)** PCR analysis for potential non-specific integration of the targeting vector at off-target coding regions for *GABPBIL* sgRNA-2 **(D)**, *GABPBIL* sgRNA-1 **(E)** and control sgRNA **(F)**. **(G)** Immunoblotting for  $\beta$ 1 with  $\beta$ 1L isoform (top, upper marked band) and  $\beta$ 1S isoforms (top, lower marked bands) compared to a Cyclophilin B loading control (bottom) in all CRISPR-Cas9-edited cell lines. Asterisk (\*) designates non-specific bands. **(H)** *GABPBIL* expression in  $\beta$ 1L-reduced clones relative to CTRL 48 hr following transfection with empty vector (VECTOR) or  $\beta$ 1L expression vector. \*\*p value<0.01, two-sided Student's t-test compared to respective VECTOR control. Values are mean  $\pm$  S.D. of three independent experiments.

**Table S2, related to Figure 2. Summary of clones generated by CRISPR-Cas9 editing.**

| Parental | sgRNA     | GABPB1L<br>copy number | Clone # | GABPB1L<br>allele 1        | GABPB1L<br>allele 2                                        | GABPB1L<br>allele 3                      | GABPB1L<br>allele 4      | GABPB1L<br>allele 5                     |
|----------|-----------|------------------------|---------|----------------------------|------------------------------------------------------------|------------------------------------------|--------------------------|-----------------------------------------|
| GBM1     | CTRL      |                        |         |                            |                                                            |                                          |                          |                                         |
| GBM1     | GABPB1L-1 | 2                      | 1       | Puro cassette<br>insertion | 3bp in-frame<br>deletion                                   |                                          |                          |                                         |
| GBM1     | GABPB1L-2 | 2                      | 2       | Puro cassette<br>insertion | A frameshift<br>insertion                                  |                                          |                          |                                         |
| T98G     | CTRL      |                        |         |                            |                                                            |                                          |                          |                                         |
| T98G     | GABPB1L-2 | 5                      | 1       | Puro cassette<br>insertion | 3bp in-frame<br>deletion +<br>AA>GG<br>dinucleotide<br>sub | 7bp frameshift<br>deletion + A>T<br>sub  | 3bp in-frame<br>deletion | 7bp frameshift<br>deletion + A>G<br>sub |
| T98G     | GABPB1L-2 | 5                      | 2       | Puro cassette<br>insertion | 3bp in-frame<br>deletion +<br>A>G sub                      | 13bp frameshift<br>deletion + G>A<br>sub | 3bp in-frame<br>deletion | 13bp frameshift<br>deletion             |
| LN229    | CTRL      |                        |         |                            |                                                            |                                          |                          |                                         |
| LN229    | GABPB1L-2 | 3                      | 1       | Puro cassette<br>insertion | Puro cassette<br>insertion                                 | Wild-type                                |                          |                                         |
| LN229    | GABPB1L-2 | 3                      | 2       | Puro cassette<br>insertion | 1bp frameshift<br>deletion                                 | 5bp frameshift<br>deletion               |                          |                                         |
| HCT116   | CTRL      |                        |         |                            |                                                            |                                          |                          |                                         |
| HCT116   | GABPB1L-2 | 2                      | 1       | Puro cassette<br>insertion | A frameshift<br>insertion                                  |                                          |                          |                                         |
| HCT116   | GABPB1L-2 | 2                      | 2       | Puro cassette<br>insertion | A frameshift<br>insertion                                  |                                          |                          |                                         |

|         |           |   |   |                            |                                             |                                                               |                          |
|---------|-----------|---|---|----------------------------|---------------------------------------------|---------------------------------------------------------------|--------------------------|
| HEK293T | CTRL      |   |   |                            |                                             |                                                               |                          |
| HEK293T | GABPB1L-2 | 3 | 1 | Puro cassette<br>insertion | Puro cassette<br>insertion                  | Wild-type                                                     |                          |
| HEK293T | GABPB1L-2 | 4 | 2 | Puro cassette<br>insertion | Puro cassette<br>insertion                  | 7bp frameshift<br>deletion                                    | 3 bp-inframe<br>deletion |
| NHAPC5  | CTRL      |   |   |                            |                                             |                                                               |                          |
| NHAPC5  | GABPB1L-2 | 3 | 1 | Puro cassette<br>insertion | 13bp<br>frameshift<br>deletion + G>T<br>sub | 14bp frameshift<br>deletion +<br>TGA>GTT<br>trinucleotide sub |                          |
| NHAPC5  | GABPB1L-2 | 2 | 2 | Puro cassette<br>insertion | 4bp frameshift<br>deletion                  |                                                               |                          |

---

**Table S3, related to Figure 2. Deletions induced by site-directed mutagenesis for the NanoBiT Protein-Protein Interaction assay.**

| <b>Deletion</b> | <b>Deletion</b>                                    | <b>Forward Primer</b>                 | <b>Reverse Primer</b>                 |
|-----------------|----------------------------------------------------|---------------------------------------|---------------------------------------|
| Reference       | CAGCTCCTAAAGAAAGAACAGGAAGC<br>AGAGGCCTACAGACAGAAGT | N/A                                   | N/A                                   |
| DEL1            | CAGCTCCTAAAGA---AACAGGAAGCA<br>GAGGCCTACAGACAGAAG  | GCCTCTGCTTCCTGTTTCTTTAGGAGC<br>TGCTGT | ACAGCAGCTCCTAAAGAAACAGGAAG<br>CAGAGGC |
| DEL2            | CAGCTCCTAAAGAAAGAACAGGAAGC<br>AGAGGCCTACAGAC---AG  | GCAGAGGCCTACAGACAGTTGGAAGC<br>TATGAC  | GTCATAGCTTCCAAGTGTCTGTAGGCC<br>TCTGC  |
| DEL3            | CAGCTCCTAAAGAAAGAACAGGAAGC<br>AGTGGCCTAC-----AG    | GTCATAGCTTCCAAGTGTAGGCCTCTG<br>CTTCC  | GGAAGCAGAGGCCTACAGTTGGAAGC<br>TATGAC  |

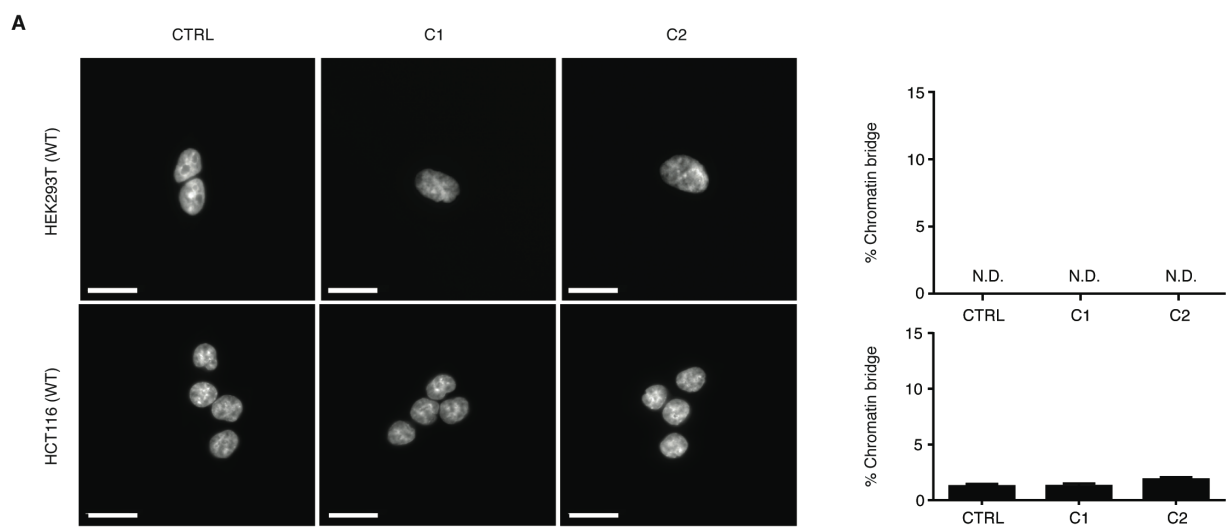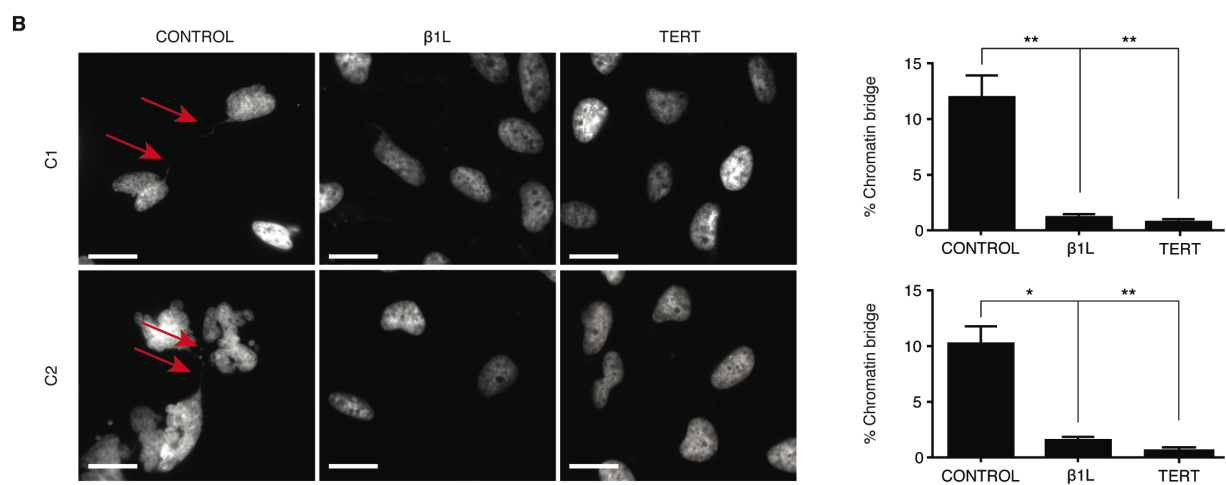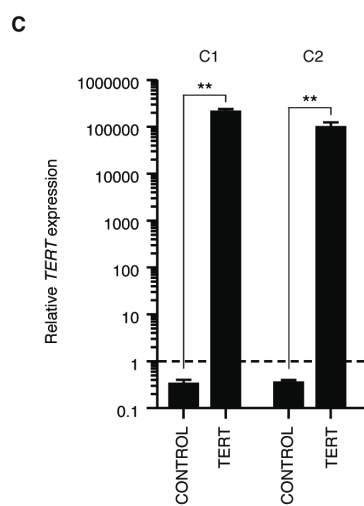

**Figure S4, related to Figure 3.** Expression of exogenous  $\beta$ 1L or TERT is sufficient to rescue telomere dysfunction in  $\beta$ 1L-reduced LN229 lines. **(A)** Representative DAPI images (left images) and quantification (right graphs) of chromatin bridges in CTRL or  $\beta$ 1L-reduced clones derived from HCT116 or HEK293T *TERT* promoter wild-type lines. Scale bar = 20  $\mu$ m. N.D. = Not detected. Quantification values are weighted mean  $\pm$  S.D. of at least ten independent fields of view. **(B)** Representative DAPI images (left images) and quantification (right graphs) of chromatin bridges in  $\beta$ 1L-reduced LN229 clones transfected with a CONTROL,  $\beta$ 1L, or TERT expression vector. Scale bar = 20  $\mu$ m. \*p value<0.05, \*\*p value<0.01, two-sided Student's t-test relative to CONTROL. Quantification values are weighted mean  $\pm$  S.D. of at least ten independent fields of view. **(C)** *TERT* expression measured by RT-qPCR 7 days post-transfection of  $\beta$ 1L-reduced LN229 clones (58 days post-editing) with either a CONTROL or TERT expression vector. \*\*p value<0.01, two-sided Student's t-test relative to CONTROL. Values are mean  $\pm$  S.D. of three independent experiments.

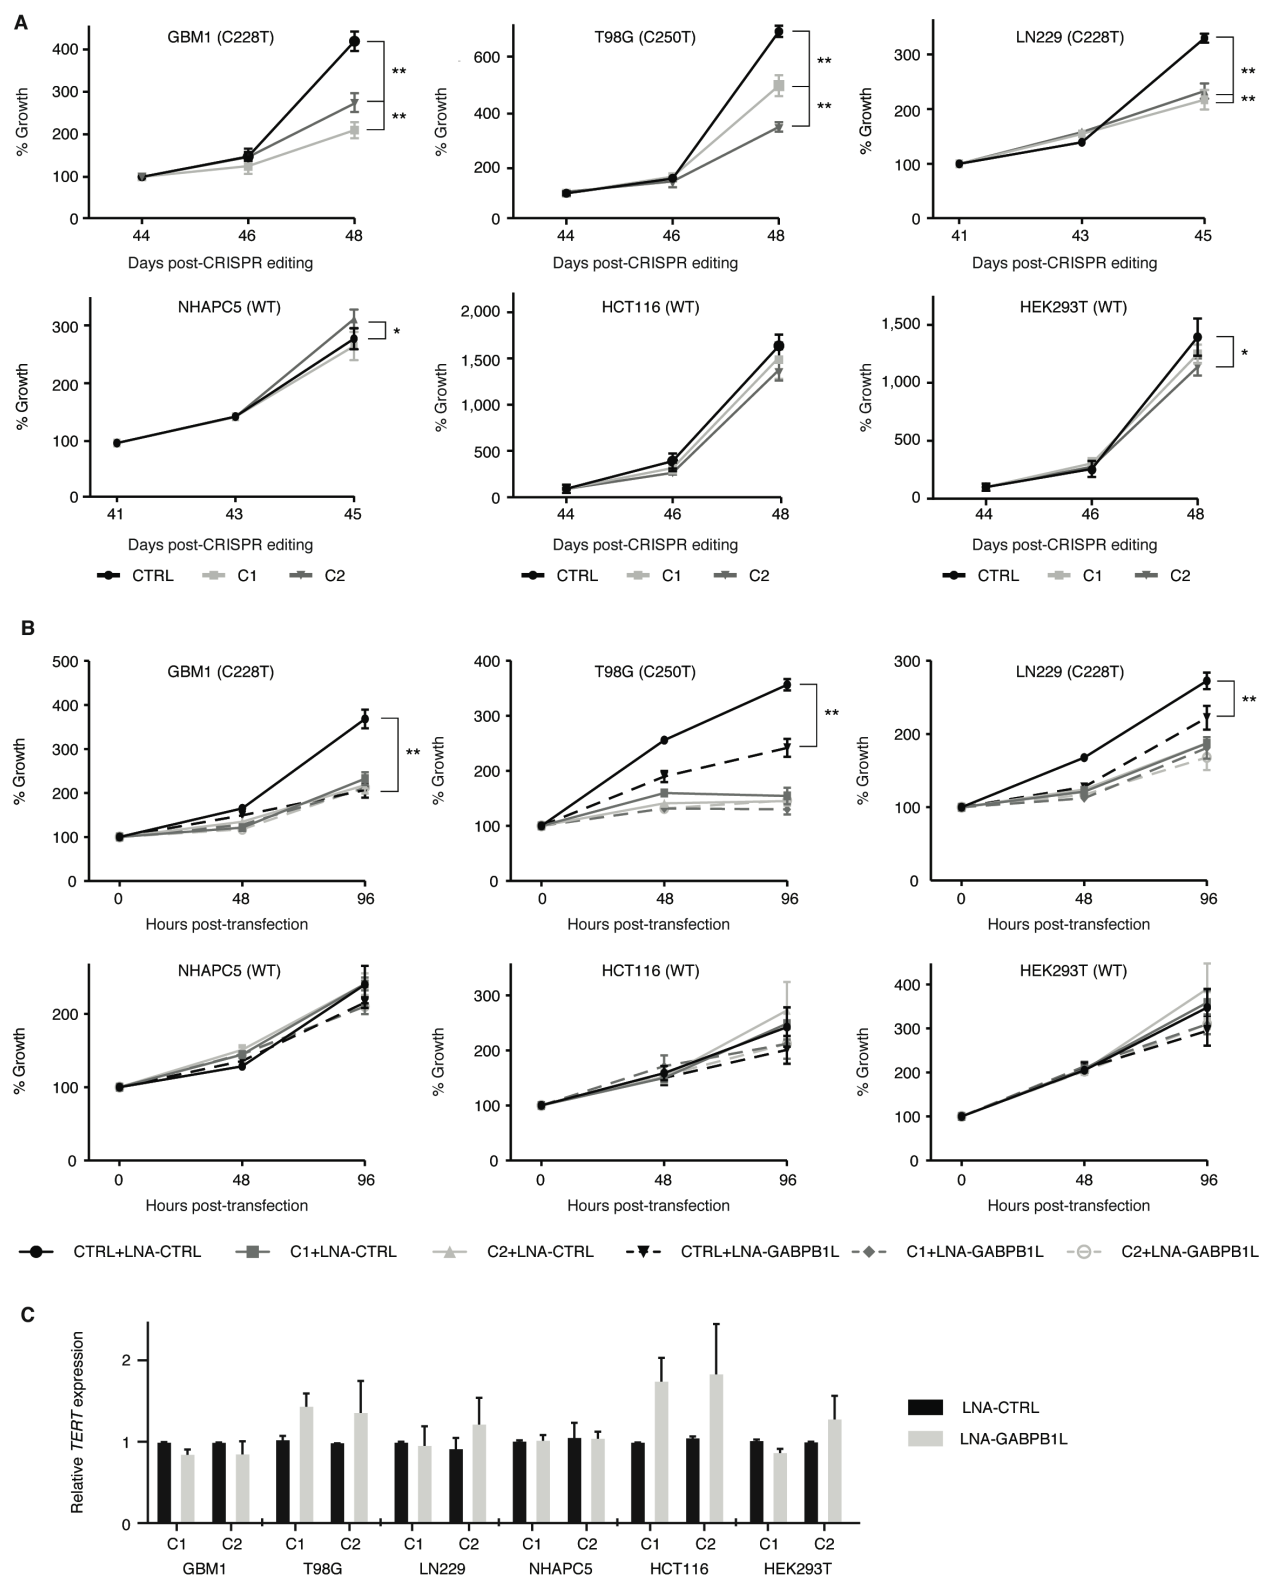

**Figure S5, related to Figure 4.**  $\beta$ 1L reduction induces growth defects in *TERT* promoter mutant lines. (A) Percent growth of *TERT* promoter mutant (top graphs) and wild-type (bottom graphs)

CRISPR control (CTRL) or  $\beta$ 1L-reduced clones (C1 and C2) relative to the initial time point. \*p value<0.05, \*\*p value<0.01, two-sided Student's t-test compared to CTRL (final time point). **(B)** Percent growth of *TERT* promoter mutant (top graphs) and wild-type (bottom graphs) CRISPR control (CTRL) or  $\beta$ 1L-reduced clones (C1 and C2) relative to the initial time point following transfection with a scrambled control (LNA-CTRL) or *GABPB1L*-targeting (LNA-GABPB1L) LNA-ASO. Growth was measured 0, 48, and 96 hr post-transfection. \*p value<0.05, \*\*p value<0.01, two-sided Student's t-test compared to a control LNA-ASO (LNA-CTRL) at the final time point for each clone (CTRL or  $\beta$ 1L-reduced). **(C)** Relative *TERT* expression of  $\beta$ 1L-reduced clones following transfection with a scrambled control (LNA-CTRL) or *GABPB1L*-targeting (LNA-GABPB1L) LNA-ASO. All values are mean  $\pm$  S.D. of three independent experiments.

**Table S5, related to Figure 5. GO-enrichment for genes differentially expressed between control and  $\beta$ 1L-reduced *TERT* promoter mutant lines.**

| Process                | GO Term Accession | Gene Determinants                                                                                                                                                                                                                                                           | FDR         |
|------------------------|-------------------|-----------------------------------------------------------------------------------------------------------------------------------------------------------------------------------------------------------------------------------------------------------------------------|-------------|
| Glucuronidation        | 0052697           | UGT1A10, UGT1A8, UGT1A1, UGT1A4, UGT1A5, UGT1A3, UGT1A9                                                                                                                                                                                                                     | 1.44E-11    |
|                        | 1904223           |                                                                                                                                                                                                                                                                             |             |
|                        | 1904224           |                                                                                                                                                                                                                                                                             |             |
|                        | 2001030           |                                                                                                                                                                                                                                                                             |             |
|                        | 2001029           |                                                                                                                                                                                                                                                                             |             |
|                        | 0052696           |                                                                                                                                                                                                                                                                             |             |
|                        | 0052695           |                                                                                                                                                                                                                                                                             |             |
|                        | 0006063           |                                                                                                                                                                                                                                                                             |             |
|                        | 0019585           |                                                                                                                                                                                                                                                                             |             |
|                        | 0044707           |                                                                                                                                                                                                                                                                             |             |
| Cellular development   | 0044767           | HOXC12, RHOU, FST, COL9A1, TMEM176B, SHANK1, UGT1A1, LRP5, EDIL3, CXCR4, NTF3, NPY, OGN, DKK1, GPR183, ZDHHC15, LGI4, RPS6KA6, ICK, FRK, MGP, LPAR3, ADAMTS2, KCNJ10, FERMT3, SP7, TERT, S100A9, VNN1, NTRK2, GABRA4, STC1, S100A8, PCOLCE, CD1D, PTGS2, KCNA1, ANKRD1, HGF | 3.0903E-08  |
|                        | 0032502           |                                                                                                                                                                                                                                                                             |             |
|                        | 0044763           |                                                                                                                                                                                                                                                                             |             |
|                        | 0048856           |                                                                                                                                                                                                                                                                             |             |
|                        | 0048869           |                                                                                                                                                                                                                                                                             |             |
|                        | 007275            |                                                                                                                                                                                                                                                                             |             |
|                        | 0007267           |                                                                                                                                                                                                                                                                             |             |
| Cell-to-cell signaling | 0099536           | STX11, DKK1, LPAR3, TACR1, HCN4, KCNJ10, NPBWR1, SHANK1, TERT, S100A9, NTRK2, CXCL5, GABRA4, LRP5, CCL8, PTGS2, KCNA1, NTF3, NPY, HGF                                                                                                                                       | 8.26038E-08 |
|                        | 0099537           |                                                                                                                                                                                                                                                                             |             |
|                        | 0045922           |                                                                                                                                                                                                                                                                             |             |
| Fatty acid metabolism  | 0019217           | UGT1A10, UGT1A8, UGT1A1, UGT1A4, UGT1A3, UGT1A9                                                                                                                                                                                                                             | 8.31764E-07 |
|                        | 0045833           |                                                                                                                                                                                                                                                                             |             |

|                      |         |                                                                                                                                                                                          |             |
|----------------------|---------|------------------------------------------------------------------------------------------------------------------------------------------------------------------------------------------|-------------|
| Cell differentiation | 0030154 | DKK1, FST, GPR183, LGI4, FRK, MGP, COL9A1, LPAR3, TMEM176B, KCNJ10, FERMT3, SP7, SHANK1, VNN1, S100A9, NTRK2, STC1, LRP5, CXCR4, S100A8, CD1D, PTGS2, KCNA1, NTF3, NPY, OGN, HGF, ANKRD1 | 2.58226E-07 |
| Cell proliferation   | 0008283 | GPR183, LGI4, FRK, TACR1, ABCB1, ZP4, TERT, NTRK2, CXCL5, STC1, LRP5, CCL8, CD1D, PTGS2, KCNA1, NPY, NTF3, HGF, OGN                                                                      | 8.29851E-06 |

---

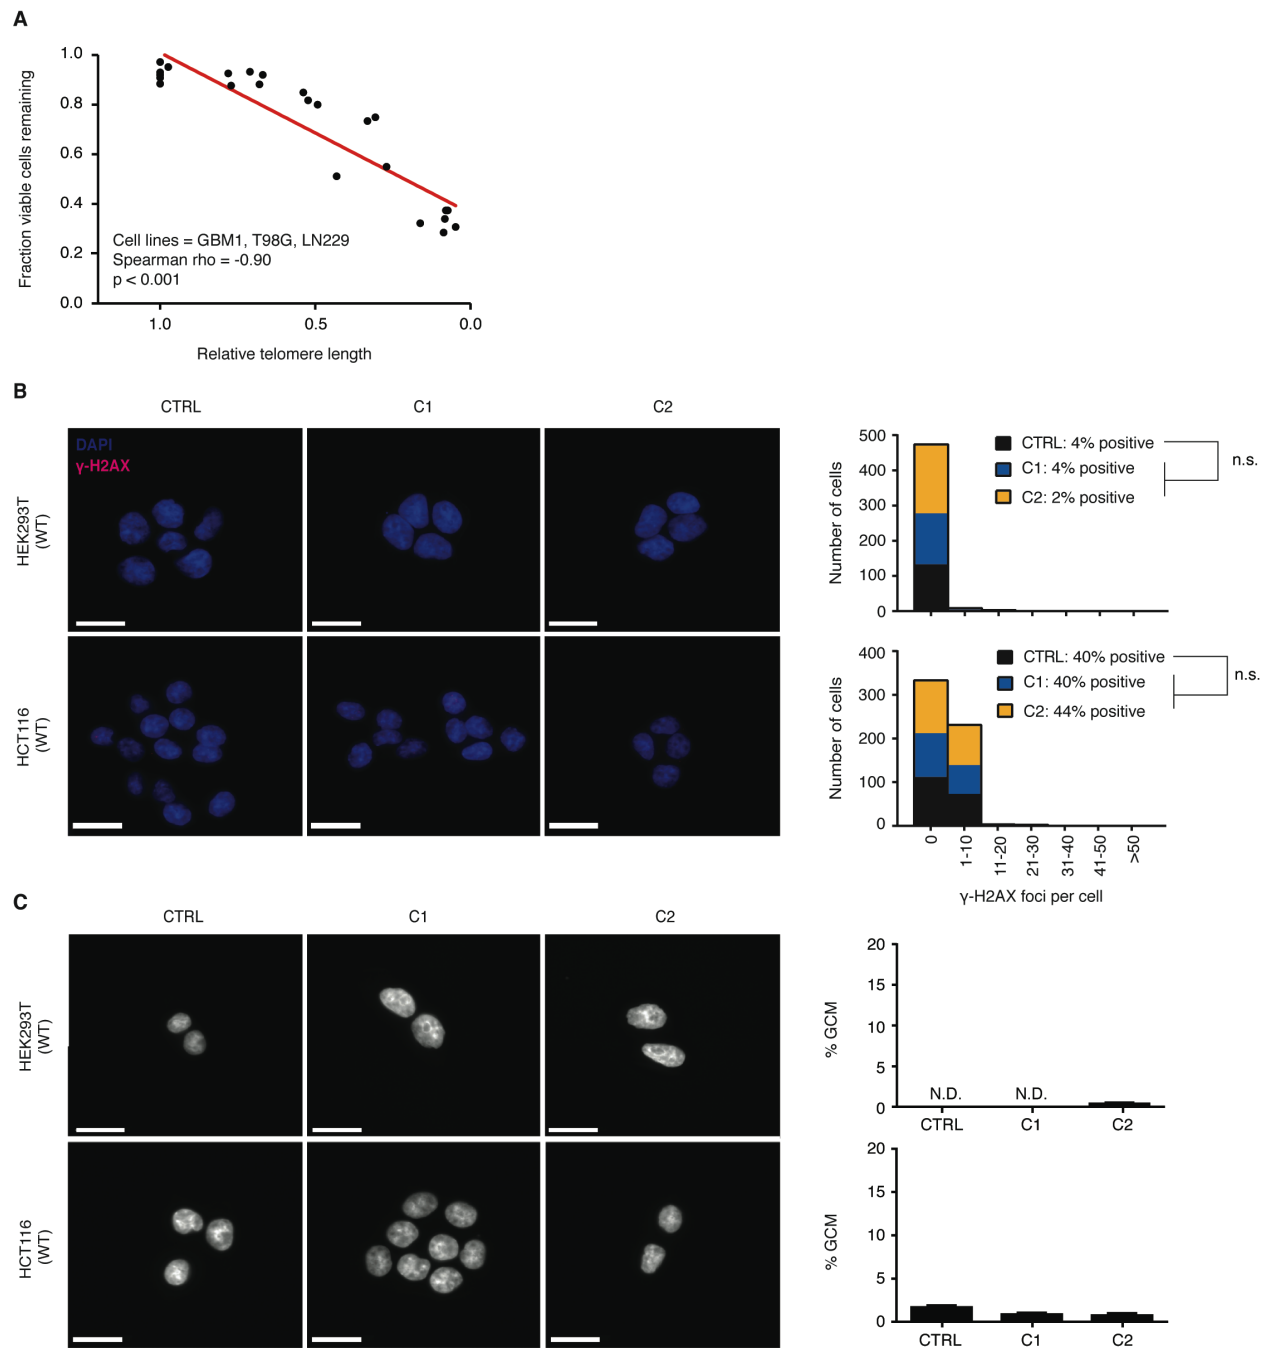

**Figure S6, related to Figure 6.**  $\beta$ 1L reduction does not induce DNA damage and mitotic cell death in *TERT* promoter wild-type cell lines. **(A)** Correlation of relative telomere length and cellular viability across  $\beta$ 1L-reduced clones from all *TERT* promoter-mutant cell lines (GBM1, T98G, and LN229). Spearman rho=-0.90, p value<0.001. **(B)** Representative images (left

images) and quantification (right graphs) of  $\gamma$ -H2AX staining in CTRL or  $\beta$ 1L-reduced HCT116 and HEK293T clones. Scale bar = 20  $\mu$ m. n.s. = not significant, two-sided Student's t-test compared to CTRL. Quantification values are sums of at least ten independent fields of view.

**(C)** Representative DAPI images (left images) and quantification (right graphs) of giant cell micronucleation (GCM) in CTRL or  $\beta$ 1L-reduced HCT116 and HEK293T clones. Scale bar = 20  $\mu$ m. N.D = Not detected. Quantification values are weighted mean  $\pm$  S.D. of at least ten independent fields of view.

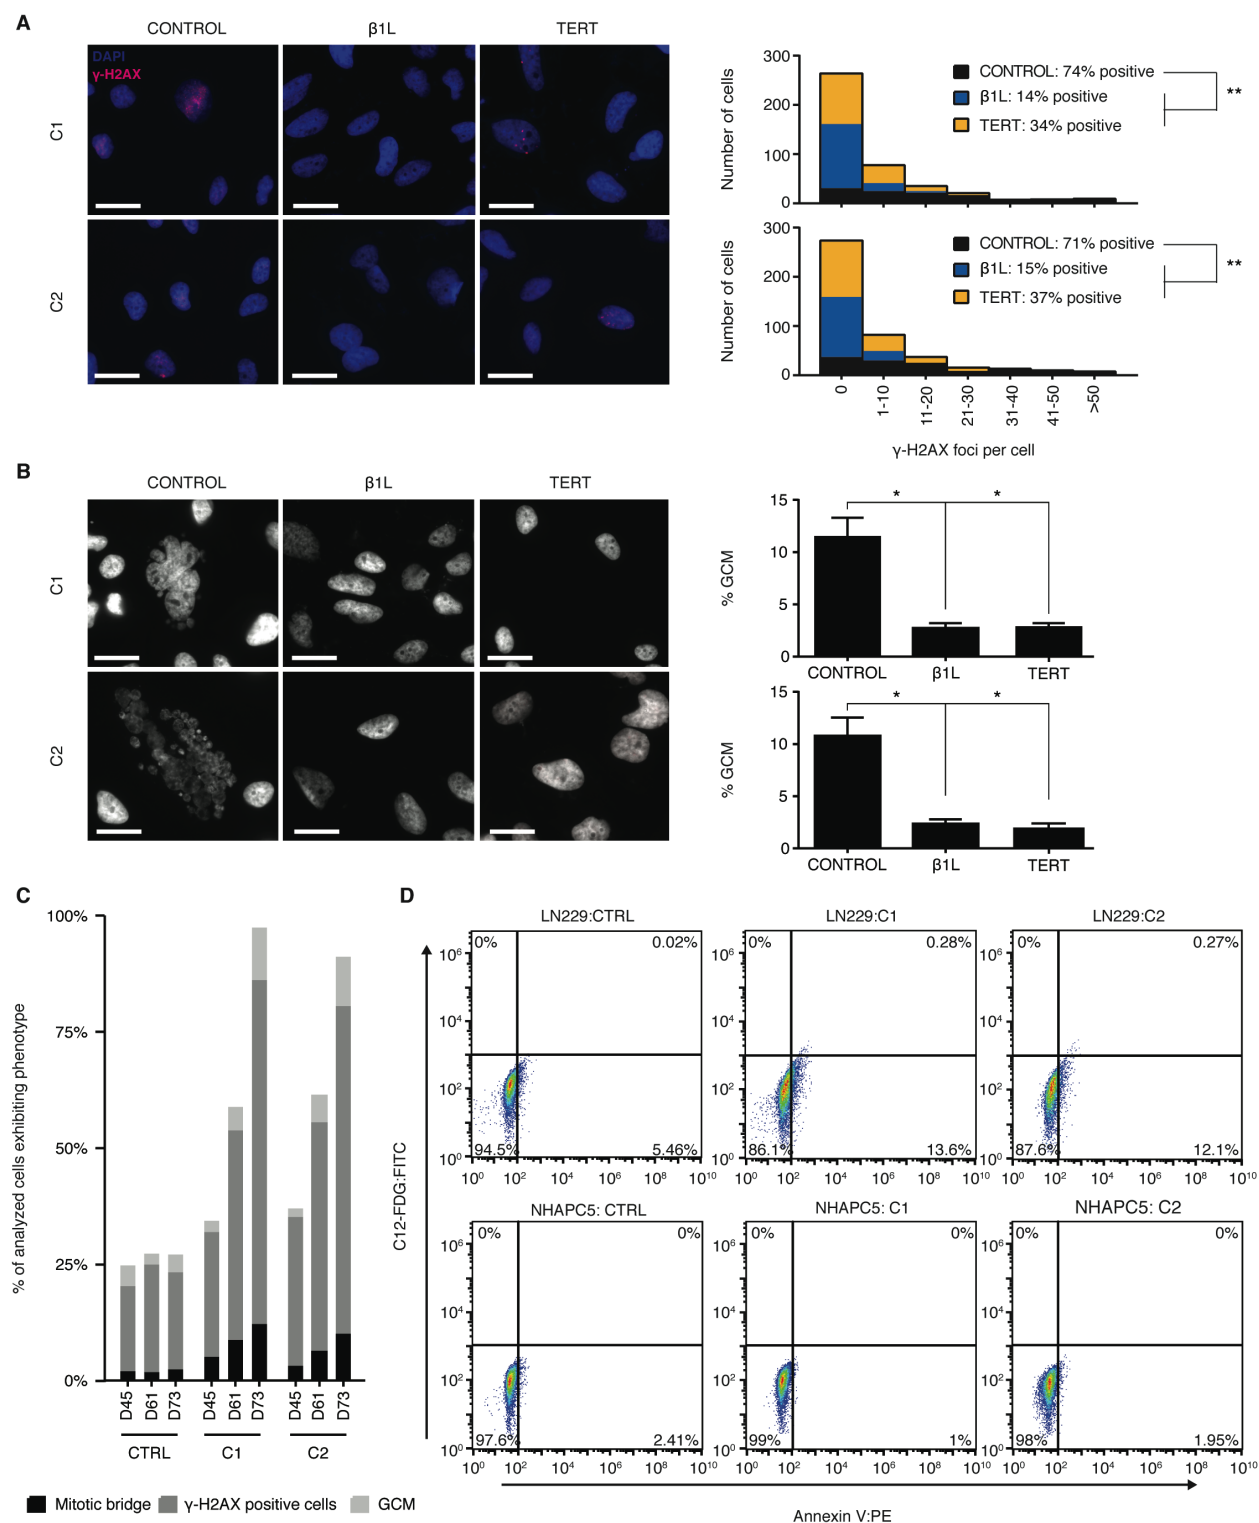

**Figure S7, related to Figure 6.** Expression of exogenous β1L or TERT is sufficient to rescue DNA damage and mitotic cell death in β1L-reduced LN229 clones. **(A)** Representative images

(left images) and quantification (right graphs) of  $\gamma$ -H2AX staining in  $\beta$ 1L-reduced LN229 clones transfected with a CONTROL,  $\beta$ 1L, or TERT expression vector at 73 days post-editing. Scale bar = 20  $\mu$ m. \*p value<0.05, \*\*p value<0.01, Student's t-test relative to CONTROL. Quantification values are sums of at least ten independent fields of view. **(B)** Representative DAPI images (left images) and quantification (right graphs) of giant cell micronucleation (GCM) in  $\beta$ 1L-reduced LN229 clones transfected with a CONTROL,  $\beta$ 1L, or TERT expression vector at 73 days post-editing. Scale bar = 20  $\mu$ m. \*p value<0.05, Student's t-test relative to CONTROL. Quantification values are weighted mean  $\pm$  S.D. of at least ten independent fields of view. **(C)** Quantification of chromatin bridge formation,  $\gamma$ -H2AX staining (% positive cells), and giant cell micronucleation (GCM) in LN229 CTRL and  $\beta$ 1L-reduced lines at days 45, 61, and 73 post-editing. Values are mean of at least five independent fields of view. **(D)** Dot plots quantifying expression of the apoptosis/necrosis marker annexin-V (PE; x-axis) and the senescence marker SA- $\beta$ -Gal (C-12FDG [FITC]; y-axis) as determined by flow cytometry at day 75 post-editing.
